# Supplementary material
Source: publisher site journal article supplement (https://www.kjim.org/upload/media/kjim-2021-026-suppl2.pdf)
Supplement: Supplementary file 1 [file kjim-2021-026-suppl2.pdf]

**Supplementary Table 2. Masking (indoor space with other people) and hand-washing adherence before the COVID-19 outbreak**

| Variable             | Masking (public indoor places) |                                  |                  |         | Correct hand-washing practice |                                  |                  |         |
|----------------------|--------------------------------|----------------------------------|------------------|---------|-------------------------------|----------------------------------|------------------|---------|
|                      | Never or seldom <sup>a</sup>   | Always or generally <sup>a</sup> | OR (95% CI)      | p value | Never or seldom <sup>a</sup>  | Always or generally <sup>a</sup> | OR (95% CI)      | p value |
| <b>Sex</b>           |                                |                                  |                  |         |                               |                                  |                  |         |
| Male                 | 219                            | 21                               | 1.0              | -       | 118                           | 122                              | 1.0              | -       |
| Female               | 324                            | 40                               | 1.29 (0.74–2.24) | 0.372   | 129                           | 235                              | 1.76 (1.26–2.46) | 0.001   |
| <b>Age group, yr</b> |                                |                                  |                  |         |                               |                                  |                  |         |
| 18–49                | 336                            | 36                               | 1.0              | -       | 150                           | 222                              | 1.0              | -       |
| ≥ 50                 | 207                            | 25                               | 1.13 (0.66–1.93) | 0.663   | 97                            | 135                              | 0.94(0.67–1.31)  | 0.718   |
| <b>Occupation</b>    |                                |                                  |                  |         |                               |                                  |                  |         |
| Public               | 507                            | 58                               | 1.0              | -       | 235                           | 330                              | 1.0              | -       |
| HCWs                 | 36                             | 3                                | 0.73 (0.22–2.44) | 0.787   | 12                            | 27                               | 1.60 (0.79–3.23) | 0.184   |

COVID-19, coronavirus disease 2019; OR, odds ratio; CI, confidence interval; HCW, health-care workers.

<sup>a</sup>Likert-type responses: “Never do,” “Seldom do,” “Generally do,” “Always do.”
